# Supplementary material
Source: publisher figshare collection journal article supplement (https://rs.figshare.com/ndownloader/files/28860747)
Supplement: Supplementary file 1 [file 28860747]

[Datafile S1. Tree for 17 kingdom-level clades]


#NEXUS 

tree PAUP_1 = [&R] (Listeriaceae:4200.000000,(Hyperthermus.butylicus.DSM5456:3806.010249,(((((Crypthecodiniumcohnii:1545.888493,Emilianiahuxleyi:1545.888494):80.154238,(((((Zamiaceae200:738.532195,Mesostigmaviride:738.547260):197.756930,Dunaliellasalina:936.304191):401.965079,(Guillardiatheta:1102.815675,Leucocryptosmarina:1102.815675):235.453596):148.207320,Porphyrayezoensis:1486.476589):63.642095,Cyanophoraparadoxa:1550.118685):75.924047):72.380184,Diplonemapapillatum:1698.422916):74.731220,Mastigamoebabalamuthi:1773.154136):7.937535,(((Hypsibiusd:959.604605,Monosigabrevicollis:959.598700):122.069528,Capsasporaowczarzaki:1081.668228):214.043384,basGeastrumpectinatum:1295.703361):485.380060):2024.920000):394.000000):0;
End;
